# Supplementary material for: CD147 increases mucus secretion induced by cigarette smoke in COPD
Source: PubMed Central journal article supplement (PMC6364420; doi:10.1186/s12890-019-0791-0), 2019-02-06

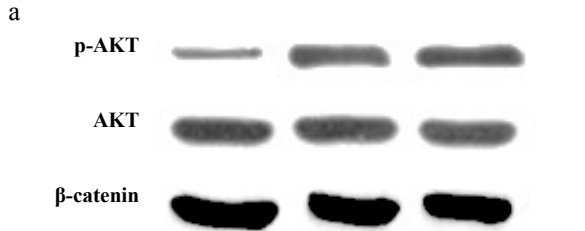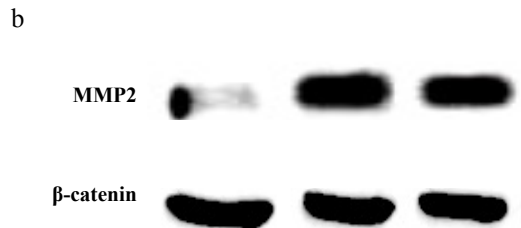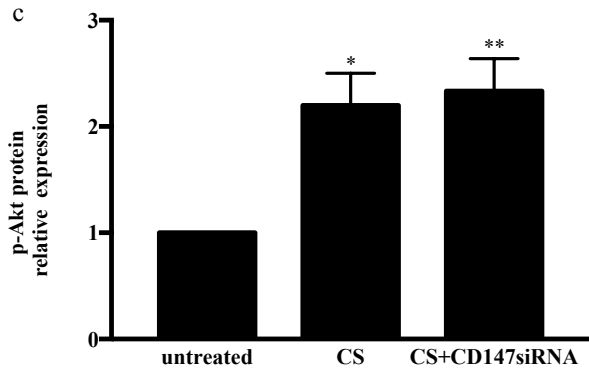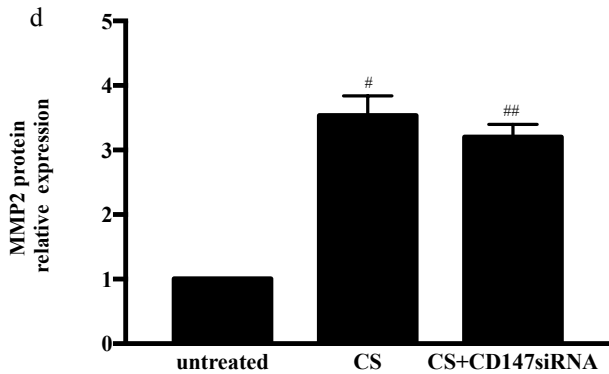

Supplement: 12890_2019_791_MOESM1_ESM.pdf [file 12890_2019_791_MOESM1_ESM.pdf]
